# Supplementary material for: Comparisons of Anatomical Characteristics and Transcriptomic Differences between Heterografts and Homografts in Pyrus L.
Source: MDPI journal article supplement (doi:10.3390/plants11050580), 2022-02-22
Supplement: s1 [file s1]

Table S1. Oligonucleotide primers used in this study.

| Genes                           | Forward primers (5'-3')  | Reverse primers (5'-3')  |
|---------------------------------|--------------------------|--------------------------|
| Pbr003641.1                     | GTTACTCCACCTCCGTCTGC     | AAGTCCGCAAACCTGGCACTA    |
| Pbr015955.1                     | GGGTTGCCACCTTTCGTACT     | TTCAGAGGGATTTTCTGGGGC    |
| Pbr016210.1                     | GTCCCCGGCGGAATCTC        | ACATTCCCCACTCCCTCTCA     |
| Pbr037054.1                     | AACGTGGCACTACCACTCAC     | ACACGACGATGACACCCTTC     |
| Pbr004636.1                     | TCGCAGGCGACCGTG          | ACCAGACCCGAACAAACAGC     |
| Pbr012591.1                     | AGCCCTGGAAAGAGTTCGTG     | ACTTGTGCCTCCTGTTTCGAG    |
| Pbr021785.1                     | AGCTCCAGTGATGGCGAATC     | ACCGATCCTATGGTCATGCG     |
| Pbr035679.1                     | ATAGTTTTGGGAAACAGACCCTCA | CCACAGATGTTGGGGTGGAA     |
| Pbr035767.1                     | ACGTGTGGGAGAGCAGATTG     | TTCGCCAGCATGTCTTAGCA     |
| Pbr039935.1                     | CCCAACAAACACTCTGCTGC     | CGGGAAACCGTGGTAATCCA     |
| Pbr016153.1                     | ATGCTGAAAGGTCAGCTCCC     | GTGAAGGATTCTTGGCCCGA     |
| Pbr010535.1                     | CTATGTTCCCATCTGGCGGG     | CCAGATCGGCCTTCTTTGGT     |
| Pbr015152.1                     | CGGGATTATCATCGACGGCA     | TGACAGCATTTGCTGCACAC     |
| Pbr015699.1                     | CGGGTTTGGCTAGGGACATT     | TCTCTGTTTCACTCTCATTTTCCA |
| Pbr036247.1                     | CGGCCGAGTCAAACACAATC     | GGGTTGGTGATCACATCGGA     |
| Bglu13-Pbr042200.2              | TAACAGCATGTGCATGAGCG     | ATGCATCAGGAGGATTTCGA     |
| <i>ACTIN</i> (Internal control) | CGAAATCGGTAGACGCTACG     | GGGGATAGAGGGACTTGAAC     |

Table S2. Offline statistics of every samples.

| Sample | Raw Data(bp) | Clean Data(bp)         | Q30(bp)                | Total Mapped | Uniquely Mapped |
|--------|--------------|------------------------|------------------------|--------------|-----------------|
| SSS1   | 6333136800   | 5818016400<br>(91.86%) | 5972909388<br>(94.31%) | 77.15        | 89.86           |
| SSS2   | 6608074800   | 6092076000<br>(92.19%) | 6252118229<br>(94.61%) | 76.9         | 89.75           |
| SSS3   | 6161696100   | 5679644700<br>(92.17%) | 5813523993<br>(94.34%) | 76.76        | 89.9            |
| SCF1   | 6204202800   | 5712485100<br>(92.07%) | 5856683482<br>(94.39%) | 76.28        | 89.73           |
| SCF2   | 6502094700   | 5981463300<br>(91.99%) | 6149789384<br>(94.58%) | 75.81        | 89.65           |
| SCF3   | 6903761700   | 6374078400<br>(92.32%) | 6529935843<br>(94.58%) | 76.06        | 89.67           |
| SCD1   | 7665027000   | 7073992800<br>(92.28%) | 7234523101<br>(94.38%) | 76.2         | 89.67           |
| SCD1   | 7489773600   | 6917608500<br>(92.36%) | 7079130068<br>(94.51%) | 76.02        | 89.6            |
| SCD1   | 6766602600   | 6211785600 (91.8%)     | 6414492576<br>(94.79%) | 76.19        | 89.62           |
| SVC1   | 6918927000   | 6369230100<br>(92.05%) | 6565599591<br>(94.89%) | 74.31        | 88.22           |

|      |            |                        |                        |       |       |
|------|------------|------------------------|------------------------|-------|-------|
| SVC2 | 6953560500 | 6414109800<br>(92.24%) | 6577835964<br>(94.59%) | 75.59 | 89.35 |
| SVC3 | 6817350300 | 6283494900<br>(92.16%) | 6423936417<br>(94.22%) | 75.96 | 89.55 |
| DSS1 | 6417945600 | 5864499600<br>(91.37%) | 6087741142<br>(94.85%) | 76.85 | 89.57 |
| DSS2 | 6417737100 | 5922322200<br>(92.28%) | 6076078145<br>(94.67%) | 77.37 | 89.86 |
| DSS3 | 6364395000 | 5875472700<br>(92.31%) | 6033249407<br>(94.79%) | 76.94 | 89.69 |
| DCF1 | 6794866500 | 6249458100<br>(91.97%) | 6430556239<br>(94.63%) | 76.15 | 89.65 |
| DCF2 | 6626759700 | 6104902800<br>(92.12%) | 6248416039<br>(94.29%) | 76.42 | 89.72 |
| DCF3 | 6826981200 | 6273411900<br>(91.89%) | 6457024022<br>(94.58%) | 76.12 | 89.65 |
| DCD1 | 7068651000 | 6531854400 (92.4%)     | 6669972250<br>(94.35%) | 76.24 | 89.65 |
| DCD2 | 6190027500 | 5718126300<br>(92.37%) | 5862400313 (94.7%)     | 76.62 | 89.78 |
| DCD3 | 5866962600 | 5394012000<br>(91.93%) | 5559523244 (94.75)     | 76.26 | 89.72 |
| DVC1 | 6171285600 | 5701008600<br>(92.37%) | 5840311287<br>(94.63%) | 75.67 | 89.52 |
| DVC2 | 7225668600 | 6653327100<br>(92.07%) | 6844742534<br>(94.72%) | 76.09 | 89.4  |
| DVC3 | 7669818000 | 7072310400 (92.2%)     | 7242565580<br>(94.42%) | 75.75 | 89.39 |

---
