# Supplementary material for: Comparisons of Anatomical Characteristics and Transcriptomic Differences between Heterografts and Homografts in Pyrus L.
Source: MDPI journal article supplement (doi:10.3390/plants11050580), 2022-02-22
Supplement: s1 [file s1]

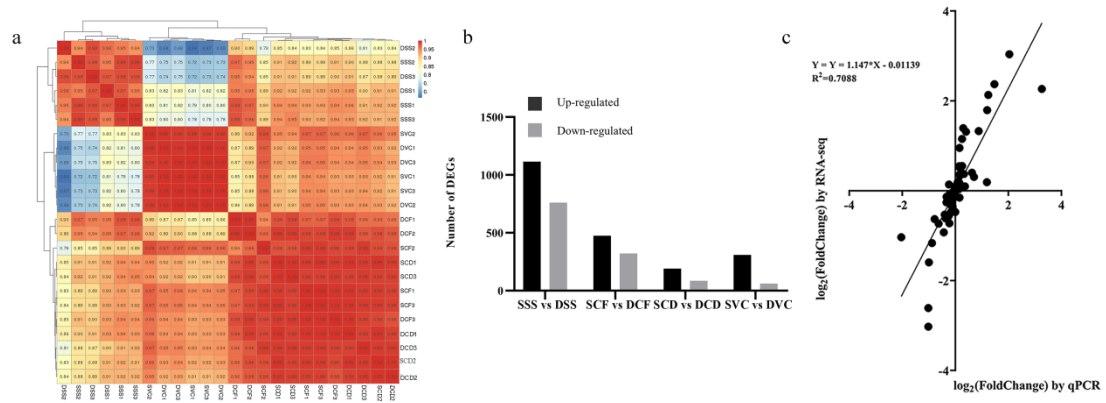

**Fig S1.** RNA-seq data and DEGs in different stages of homografts and heterografts. (a) Hierarchical clustering of 24 samples based on the correlation coefficient ( $r^2$ ) between each sample. SSS, SCF, SCD and SVC are different stages of homografts; DSS, DCF, DCD and DVC are different stages of heterografts. The color panel represents the  $r^2$  values. (b) Statistics of up- and downregulated DEGs for each pairwise comparison. Up- and downregulated DEGs are displayed in dark gray and light gray, respectively. (c) Correlation of expression changes observed by RNA-seq (Y-axis) and qPCR (X-axis).
